# Supplementary material for: Thermodynamic Selection of Steric Zipper Patterns in the Amyloid Cross-β Spine
Source: PubMed Central journal article supplement (PMC2723932; doi:10.1371/journal.pcbi.1000492), 2009-09-04
Supplement: pcbi.1000492.s010.pdf [file pcbi.1000492.s010.pdf]

| Parallel    |         | Anti-parallel     |         |
|-------------|---------|-------------------|---------|
| BBA and FFA | class 1 | AregBB and AregFF | class 5 |
| FBP         | class 2 | AregFB            | class 6 |
| BBP and FFP | class 3 | AinvP             | class 7 |
| FBA         | class 4 | AinvA             | class 8 |
