# Supplementary material for: Thermodynamic Selection of Steric Zipper Patterns in the Amyloid Cross-β Spine
Source: PubMed Central journal article supplement (PMC2723932; doi:10.1371/journal.pcbi.1000492), 2009-09-04
Supplement: pcbi.1000492.s011.pdf [file pcbi.1000492.s011.pdf]

| $d = 4.85 \text{ \AA}$ | $\Delta E_{intra}$ | $\Delta E_{vdW}$ | $\Delta E_{elec}$ | $\Delta G_{hp}$ | $\Delta G_{screen}$ | $\Delta G_{NB}$ | $-T\Delta S_{vib}$ | $\Delta G_{bind}$ |
|------------------------|--------------------|------------------|-------------------|-----------------|---------------------|-----------------|--------------------|-------------------|
| FBP1                   | 2.90               | -20.12           | 161.55            | -9.84           | -162.23             | -27.23          | 2.74               | -2.24             |
| FBP2                   | 2.02               | -17.74           | 14.41             | -8.55           | -14.73              | -24.02          | 1.52               | -0.25             |
| <b>FBA1</b>            | 3.04               | -20.35           | -29.20            | -9.89           | 26.39               | -29.97          | 1.56               | -6.16             |
| FBA2                   | 2.12               | -18.53           | -27.11            | -9.19           | 25.60               | -26.88          | 1.41               | -3.22             |
| BBP                    | 1.32               | -16.99           | 65.31             | -8.46           | -65.59              | -24.40          | 0.69               | -1.46             |
| BBA1                   | 3.10               | -20.42           | -13.72            | -9.68           | 12.80               | -27.67          | 2.42               | -3.00             |
| BBA2                   | 3.00               | -20.60           | -4.99             | -9.73           | 4.48                | -27.63          | 0.84               | -4.54             |
| FFP                    | 3.11               | -19.74           | 144.52            | -9.59           | -143.85             | -25.55          | 3.42               | 0.12              |
| FFA1                   | 2.75               | -20.20           | -52.34            | 10.05           | 48.06               | -31.57          | 2.50               | -6.82             |
| FFA2                   | 2.52               | -17.77           | 17.44             | -8.48           | -18.40              | -24.71          | 1.61               | -0.85             |
| $d = 4.92 \text{ \AA}$ | $\Delta E_{intra}$ | $\Delta E_{vdW}$ | $\Delta E_{elec}$ | $\Delta G_{hp}$ | $\Delta G_{screen}$ | $\Delta G_{NB}$ | $-T\Delta S_{vib}$ | $\Delta G_{bind}$ |
| FBP1                   | 2.38               | -21.13           | 164.21            | -9.91           | -163.39             | -27.84          | 2.65               | -2.94             |
| FBP2                   | 1.13               | -17.89           | 46.06             | -8.59           | -45.84              | -25.13          | 1.62               | -1.26             |
| FBA1                   | 2.62               | -20.86           | -17.53            | -9.86           | 15.99               | -29.64          | 2.17               | -5.22             |
| FBA2                   | 3.34               | -21.28           | -18.89            | -10.13          | 18.19               | -28.77          | 2.79               | -3.73             |
| BBP1                   | 1.85               | -18.08           | 42.56             | -8.78           | -42.70              | -25.14          | 2.24               | -0.65             |
| <b>BBA1</b>            | 2.30               | -21.32           | -11.67            | -9.99           | 10.98               | -29.69          | 3.09               | -4.35             |
| BBA2                   | 3.01               | -21.82           | 3.00              | -10.01          | -2.66               | -28.48          | 1.99               | -4.24             |
| FFP1                   | 0.80               | -14.97           | 49.51             | -6.97           | -48.72              | -20.35          | 0.26               | 2.16              |
| <b>FFA1</b>            | 2.47               | -20.46           | -33.60            | -9.84           | 31.17               | -30.26          | 2.78               | -5.23             |
| FFA2                   | 2.09               | -16.76           | -20.04            | -8.25           | 18.57               | -24.39          | 2.00               | -0.14             |
