# Supplementary material for: Thermodynamic Selection of Steric Zipper Patterns in the Amyloid Cross-β Spine
Source: PubMed Central journal article supplement (PMC2723932; doi:10.1371/journal.pcbi.1000492), 2009-09-04
Supplement: pcbi.1000492.s012.pdf [file pcbi.1000492.s012.pdf]

| $d = 4.805 \text{ \AA}$ | $\Delta E_{intra}$ | $\Delta E_{vdW}$ | $\Delta E_{elec}$ | $\Delta G_{hp}$ | $\Delta G_{screen}$ | $\Delta G_{NB}$ | $-T\Delta S_{vib}$ | $\Delta G_{bind}$ |
|-------------------------|--------------------|------------------|-------------------|-----------------|---------------------|-----------------|--------------------|-------------------|
| AinvA                   | -0.15              | -23.29           | 32.33             | -10.97          | -28.44              | -30.37          | -2.66              | -9.77             |
| AinvP1                  | -0.63              | -22.68           | 53.63             | -10.57          | -47.56              | -27.18          | -3.26              | -7.71             |
| <b>AinvP2</b>           | 1.07               | -24.19           | 6.53              | -11.86          | -5.56               | -35.08          | -2.17              | -12.76            |
| Areg1BB                 | 0.82               | -21.69           | 4.51              | -10.14          | -4.24               | -31.56          | -4.43              | -11.76            |
| Areg1FB                 | -1.11              | -23.18           | 47.99             | -10.51          | -43.13              | -28.83          | -3.57              | -10.09            |
| Areg1FF                 | -1.25              | -22.83           | 22.27             | -10.25          | -16.80              | -27.61          | -4.50              | -9.97             |
| Areg2BB                 | -0.70              | -22.25           | 63.94             | -10.75          | -56.53              | -25.59          | -1.58              | -4.46             |
| Areg2FB                 | 0.27               | -23.22           | 72.89             | -10.94          | -66.07              | -27.34          | -2.70              | -6.28             |
| Areg2FF                 | 2.24               | -22.35           | 81.59             | -10.79          | -81.06              | -32.61          | -3.20              | -10.15            |
