# Supplementary material for: Thermodynamic Selection of Steric Zipper Patterns in the Amyloid Cross-β Spine
Source: PubMed Central journal article supplement (PMC2723932; doi:10.1371/journal.pcbi.1000492), 2009-09-04
Supplement: pcbi.1000492.s013.pdf [file pcbi.1000492.s013.pdf]

| pH 7.0        | $\Delta E_{intra}$ | $\Delta E_{vdW}$ | $\Delta E_{elec}$ | $\Delta G_{hp}$ | $\Delta G_{screen}$ | $\Delta G_{NB}$ | $-T\Delta S_{vib}$ | $\Delta G_{bind}$ |
|---------------|--------------------|------------------|-------------------|-----------------|---------------------|-----------------|--------------------|-------------------|
| Ainv1A        | 6.21               | -31.16           | -95.40            | -12.23          | 86.65               | -45.94          | -10.84             | -32.62            |
| Ainv1P1       | 7.28               | -32.26           | -101.28           | -12.98          | 90.63               | -48.60          | -10.34             | -34.78            |
| Ainv1P2       | 6.86               | -32.59           | -97.14            | -12.73          | 87.48               | -48.13          | -10.36             | -34.33            |
| Ainv2A        | 5.86               | -31.01           | -109.95           | -12.85          | 98.59               | -49.36          | -9.95              | -35.15            |
| Ainv2P1       | 6.08               | -33.68           | -90.06            | -13.16          | 80.61               | -50.21          | -9.71              | -35.76            |
|               | (8.25)             | (-32.52)         | (-107.46)         | (-13.29)        | (93.64)             | (-51.47)        |                    |                   |
| Ainv2P2       | 6.25               | -32.77           | -97.39            | -13.09          | 86.53               | -50.48          | -9.75              | -36.07            |
|               | (8.16)             | (-32.62)         | (-106.59)         | (-13.21)        | (93.43)             | (-50.82)        |                    |                   |
| <b>AregBB</b> | 7.34               | -31.01           | -139.32           | -13.07          | 126.25              | -49.80          | -11.06             | -36.70            |
| AregFB        | 6.53               | -33.18           | -130.51           | -13.98          | 120.11              | -51.02          | -9.56              | -36.42            |
| <b>AregFF</b> | 8.54               | -28.44           | -180.16           | -13.38          | 161.93              | -51.51          | -10.16             | -37.51            |
|               | (9.88)             | (-30.22)         | (-172.49)         | (-13.38)        | (155.79)            | (-50.42)        |                    |                   |

  

| pH 2.0        | $\Delta E_{intra}$ | $\Delta E_{vdW}$ | $\Delta E_{elec}$ | $\Delta G_{hp}$ | $\Delta G_{screen}$ | $\Delta G_{NB}$ | $-T\Delta S_{vib}$ | $\Delta G_{bind}$ |
|---------------|--------------------|------------------|-------------------|-----------------|---------------------|-----------------|--------------------|-------------------|
| <b>Ainv1A</b> | 2.31               | -27.71           | -36.16            | -9.86           | 41.08               | -32.65          | -13.49             | -19.66            |
| Ainv1P1       | 3.63               | -26.31           | -36.54            | -9.19           | 41.77               | -30.27          | -14.06             | -16.54            |
| Ainv1P2       | 2.56               | -26.47           | -33.78            | -9.05           | 38.53               | -30.77          | -13.76             | -17.81            |
| Ainv2A        | 2.80               | -26.81           | 0.91              | -9.00           | 5.98                | -28.92          | -13.03             | -14.98            |
| Ainv2P1       | 2.91               | -27.73           | 0.27              | -9.76           | 6.59                | -30.63          | -12.71             | -16.27            |
| Ainv2P2       | 2.88               | -26.51           | -35.05            | -9.13           | 39.95               | -30.74          | -13.07             | -16.77            |
| AregBB        | 3.27               | -28.33           | -19.53            | -10.34          | 26.37               | -31.83          | -13.56             | -17.96            |
| AregFB        | 3.47               | -29.02           | -10.59            | -10.62          | 17.56               | -32.67          | -11.76             | -16.79            |
| AregFF        | 2.31               | -27.57           | 9.19              | -9.30           | 1.58                | -26.10          | -12.26             | -11.89            |
