# Supplementary material for: Thermodynamic Selection of Steric Zipper Patterns in the Amyloid Cross-β Spine
Source: PubMed Central journal article supplement (PMC2723932; doi:10.1371/journal.pcbi.1000492), 2009-09-04
Supplement: pcbi.1000492.s014.pdf [file pcbi.1000492.s014.pdf]

|                | $\Delta E_{intra}$ | $\Delta E_{vdW}$ | $\Delta E_{elec}$ | $\Delta G_{hp}$ | $\Delta G_{screen}$ | $\Delta G_{NB}$ | $-T\Delta S_{vib}$ | $\Delta G_{bind}$ |
|----------------|--------------------|------------------|-------------------|-----------------|---------------------|-----------------|--------------------|-------------------|
| AinvA          | 11.40              | -23.58           | 22.49             | -7.99           | -15.03              | -24.11          | 8.69               | 19.45             |
| AinvP1         | 18.04              | -24.33           | 20.47             | -8.57           | -14.99              | -27.42          | 8.88               | 24.38             |
| AinvP2         | 15.96              | -25.61           | 46.32             | -8.55           | -37.40              | -25.24          | 9.04               | 24.02             |
| Areg1BB        | 0.83               | -21.10           | 78.53             | -8.07           | -73.92              | -24.56          | -4.85              | -5.13             |
| Areg1FB        | -0.20              | -18.72           | 79.17             | -6.87           | -74.41              | -20.83          | -4.88              | 2.68              |
| Areg1FF        | 0.38               | -15.61           | 59.10             | -6.12           | -55.07              | -17.70          | -3.71              | 3.52              |
| Areg2BB        | -0.98              | -15.74           | 65.80             | -5.07           | -56.28              | -11.29          | -4.83              | 6.30              |
| Areg2FB        | -0.70              | -17.33           | 66.60             | -6.18           | -59.27              | -16.18          | -4.86              | 2.00              |
| <b>Areg2FF</b> | 1.60               | -23.39           | 36.54             | -8.94           | -32.89              | -28.68          | -3.44              | -7.13             |
